# Supplementary material for: Evolutionary history of enigmatic bears in the Tibetan Plateau–Himalaya region and the identity of the yeti
Source: PubMed Central journal article supplement (PMC5740279; doi:10.1098/rspb.2017.1804), 2017-11-29

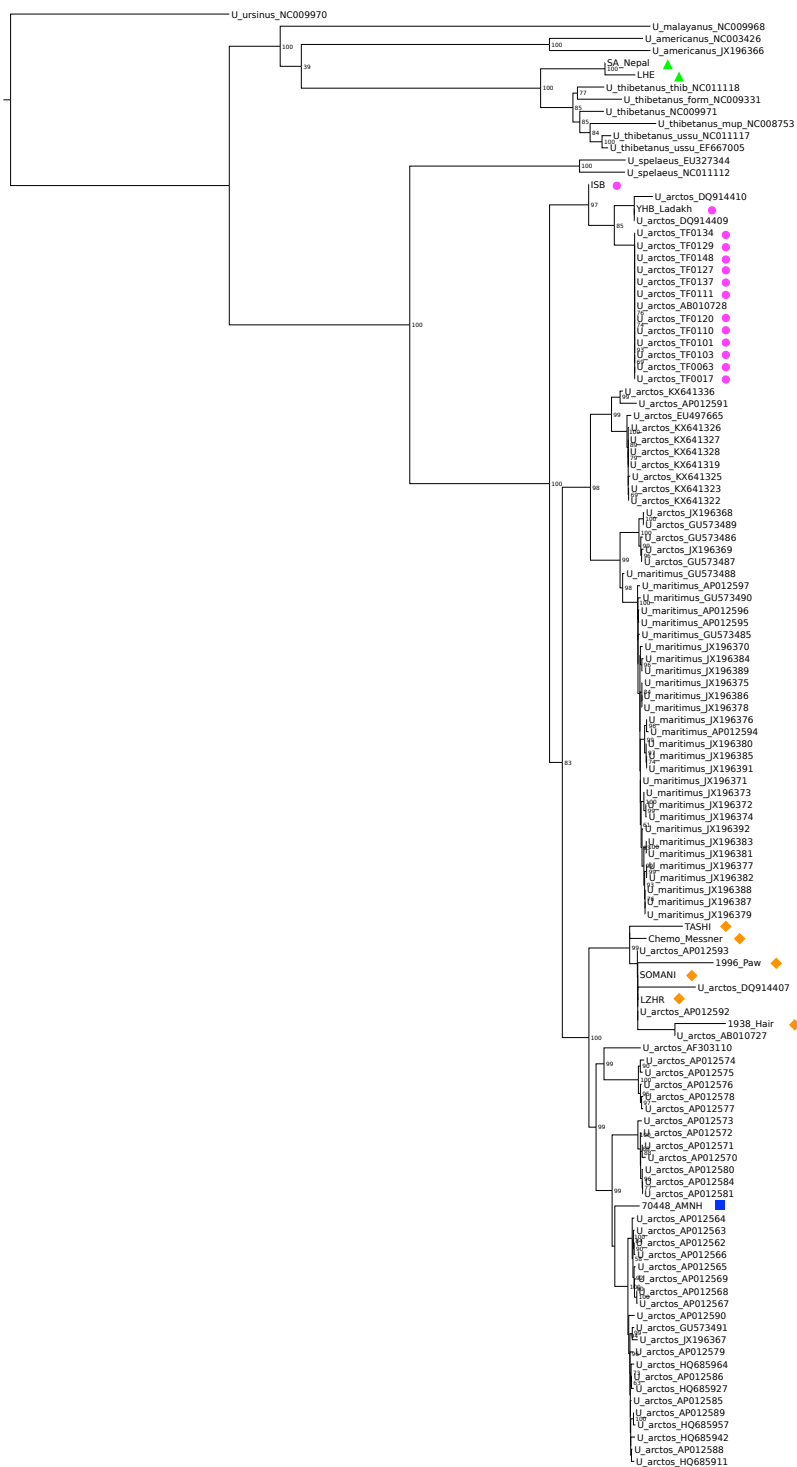

Supplement: rspb20171804supp3.pdf [file rspb20171804supp3.pdf]
